# Supplementary material
Source: Research Square preprint supplement (doi:10.21203/rs.3.rs-9314922/v1)
Supplement: Supplementary file 1 [file 07e1d8a97ead812005502352.docx]

**Supplementary Information**

| 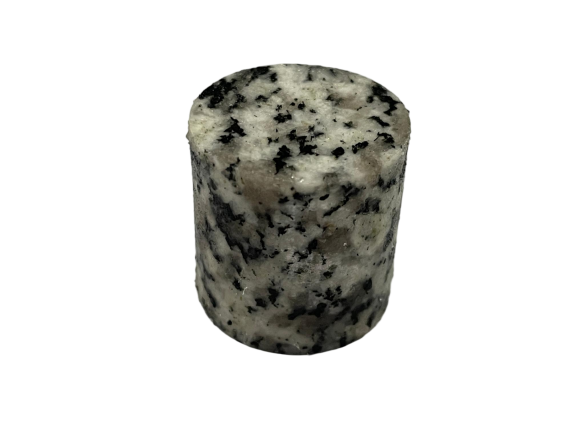   1. P-1-1 | 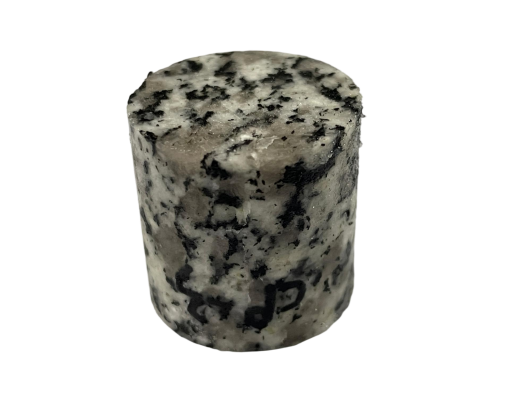   1. P-1-12 | 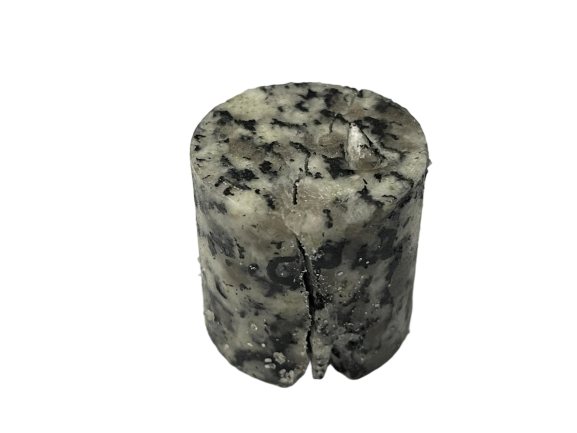   1. P-1-14 |
| --- | --- | --- |
| 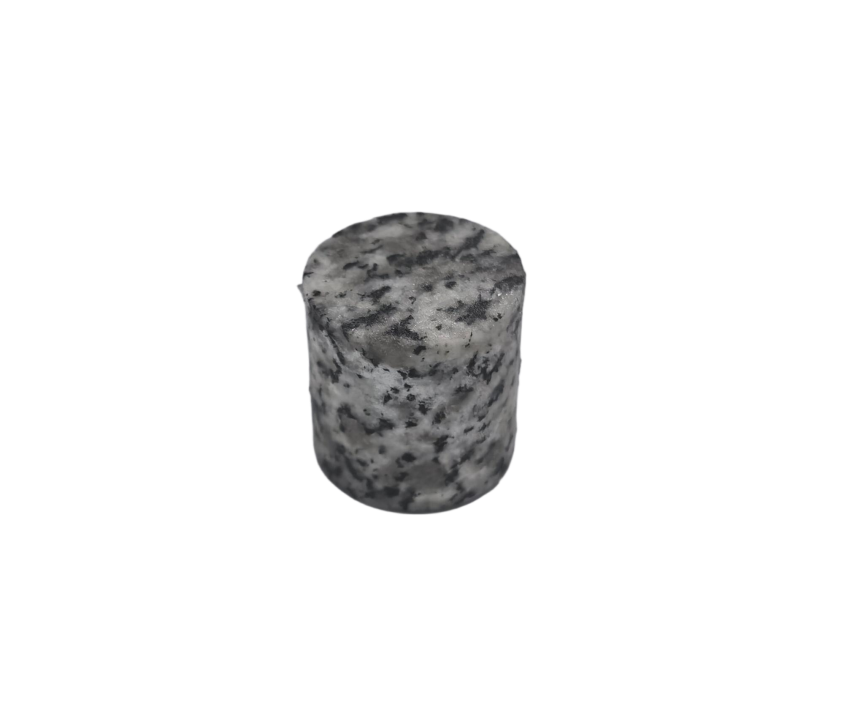   1. P-2-1 | 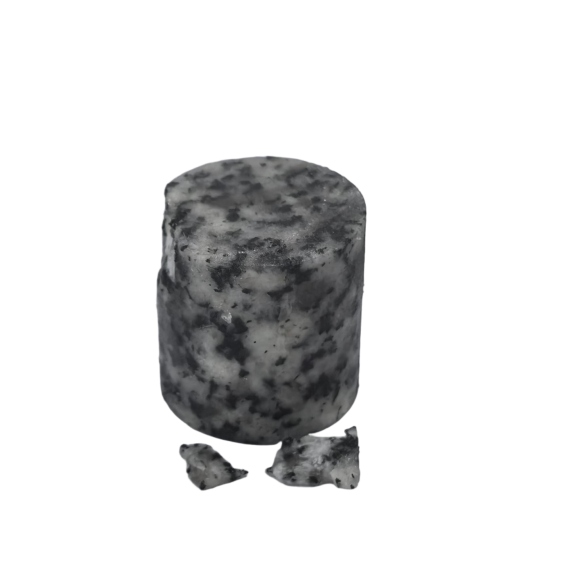   1. P-1-4 | 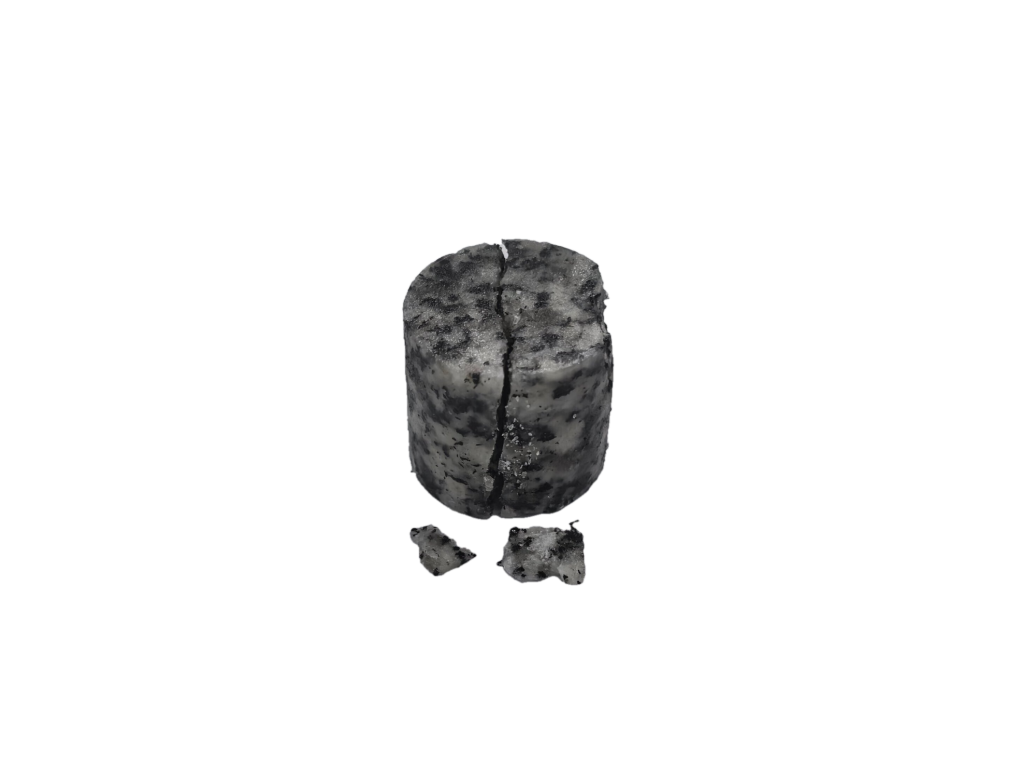   1. P-2-5 |
| 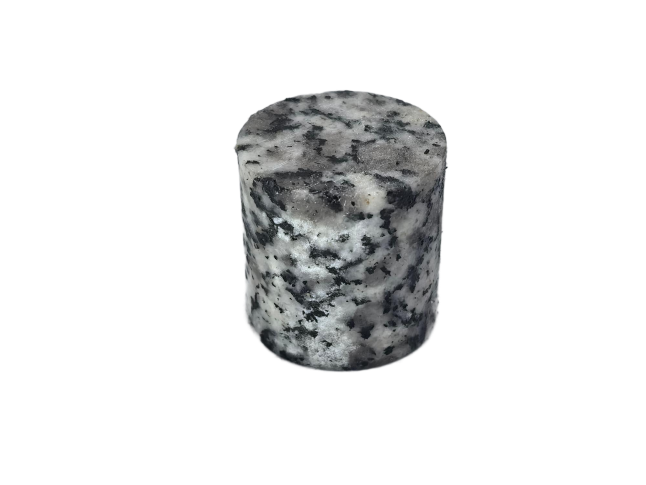   1. P-3-1 | 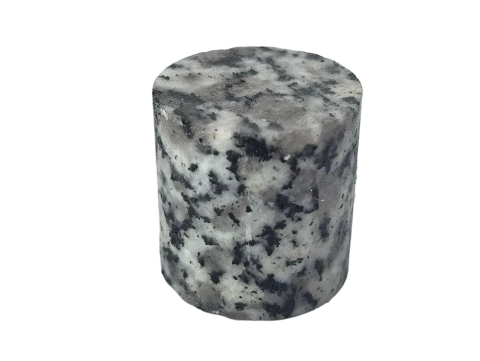   1. P-3-2 | 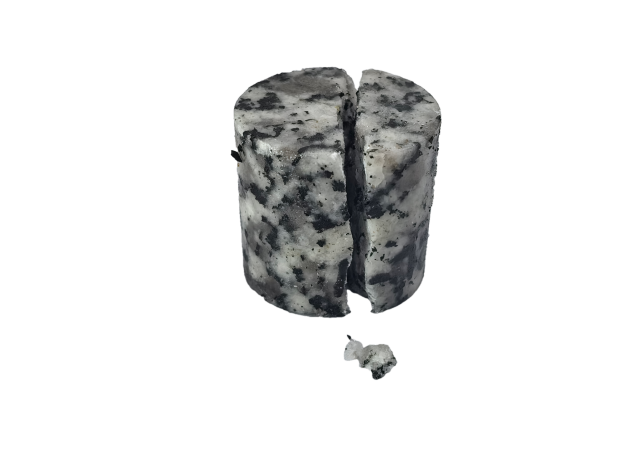   1. P-3-3 |

**Fig. S1** Macroscopic morphology of the P group at different key loading stages

**Table S1** CP group peak stress-elastic modulus data table

| **Group no.** | **Impact air pressure (MPa)** | **Impact velocity (m/s)** | **Peak stress**  **(MPa)** | **Elastic modulus (GPa)** |
| --- | --- | --- | --- | --- |
| CP-1-1 | 0.040 | 3.67 | 63.95 | 84.14 |
| CP-1-2 | 0.045 | 4.35 | 74.01 | 221.63 |
| CP-1-3 | 0.050 | 4.89 | 93.74 | 458.12 |
| CP-1-4 | 0.055 | 5.38 | 97.4 | 355.44 |
| CP-1-5 | 0.060 | 5.95 | 119.49 | 192.40 |
| CP-1-6 | 0.065 | 6.48 | 131.23 | 274.37 |
| CP-2-1 | 0.040 | 3.65 | 67.55 | 403.26 |
| CP-2-2 | 0.050 | 4.78 | 92.14 | 424.35 |
| CP-2-3 | 0.060 | 6.00 | 122.38 | 443.74 |
| CP-2-4 | 0.070 | 7.07 | 145.33 | 408.36 |
| CP-3-1 | 0.04 | 3.80 | 71.87 | 222.35 |
| CP-3-2 | 0.06 | 6.37 | 133.50 | 399.12 |
| CP-3-3 | 0.08 | 8.11 | 171.88 | 499.08 |

**Table S2** P group peak stress-elastic modulus data table

| **Group no.** | **Impact air pressure (MPa)** | **Impact velocity (m/s)** | **Peak stress**  **(MPa)** | **Elastic modulus (GPa)** |
| --- | --- | --- | --- | --- |
| P-1-1 | 0.04 | 3.720 | 80.04 | 537.34 |
| P-1-2 | 0.04 | 3.730 | 78.94 | 478.72 |
| P-1-3 | 0.04 | 3.720 | 77.57 | 414.38 |
| P-1-4 | 0.04 | 3.502 | 72.00 | 375.78 |
| P-1-5 | 0.04 | 4.340 | 70.97 | 345.58 |
| P-1-6 | 0.04 | 3.800 | 69.78 | 321.64 |
| P-1-7 | 0.04 | 4.200 | 67.98 | 298.90 |
| P-1-8 | 0.04 | 3.930 | 67.57 | 292.78 |
| P-1-9 | 0.04 | 3.800 | 65.61 | 260.98 |
| P-1-10 | 0.04 | 4.100 | 65.48 | 236.17 |
| P-1-11 | 0.04 | 3.90 | 62.74 | 213.12 |
| P-1-12 | 0.04 | 3.780 | 56.36 | 167.58 |
| P-1-13 | 0.04 | 3.770 | 51.64 | 141.13 |
| P-1-14 | 0.04 | 4.000 | 48.13 | 139.81 |
| P-2-1 | 0.05 | 5.118 | 102.57 | 446.40 |
| P-2-2 | 0.05 | 5.148 | 100.33 | 208.91 |
| P-2-3 | 0.05 | 5.080 | 100.74 | 348.91 |
| P-2-4 | 0.05 | 5.150 | 99.70 | 188.84 |
| P-2-5 | 0.05 | 5.070 | 95.70 | 100.50 |
| P-3-1 | 0.06 | 5.730 | 117.42 | 417.62 |
| P-3-2 | 0.06 | 5.600 | 116.79 | 219.24 |
| P-3-3 | 0.06 | 5.700 | 113.26 | 109.50 |

**Table S3** Variation of cumulative dissipated energy with impact cycles

| **Group no.** | **Dissipated energy per impact**  **(kJ)** | **Cumulative dissipated energy (kJ)** |
| --- | --- | --- |
| CP-1-1 | 0.133 | 0.133 |
| CP-1-2 | 0.073 | 0.206 |
| CP-1-3 | 0.068 | 0.274 |
| CP-1-4 | 0.187 | 0.461 |
| CP-1-5 | 0.307 | 0.768 |
| CP-1-6 | 0.272 | 1.040 |
| CP-2-1 | 0.095 | 0.095 |
| CP-2-2 | 0.083 | 0.179 |
| CP-2-3 | 0.046 | 0.225 |
| CP-2-4 | 0.213 | 0.438 |
| CP-3-1 | 0.141 | 0.141 |
| CP-3-2 | 0.082 | 0.223 |
| CP-3-3 | 0.042 | 0.265 |
| P-1-1 | 0.0375 | 0.0375 |
| P-1-2 | 0.0445 | 0.082 |
| P-1-3 | 0.0474 | 0.1294 |
| P-1-4 | 0.0533 | 0.1827 |
| P-1-5 | 0.0554 | 0.2381 |
| P-1-6 | 0.0625 | 0.3006 |
| P-1-7 | 0.0644 | 0.365 |
| P-1-8 | 0.0665 | 0.4315 |
| P-1-9 | 0.0854 | 0.5169 |
| P-1-10 | 0.0942 | 0.6111 |
| P-1-11 | 0.0955 | 0.7066 |
| P-1-12 | 0.148 | 0.8546 |
| P-1-13 | 0.321 | 1.1756 |
| P-1-14 | 0.724 | 1.8996 |
| P-2-1 | 0.0387 | 0.0387 |
| P-2-2 | 0.0459 | 0.0846 |
| P-2-3 | 0.185 | 0.2696 |
| P-2-4 | 0.212 | 0.4816 |
| P-2-5 | 0.258 | 0.7396 |
| P-3-1 | 0.0395 | 0.0395 |
| P-3-2 | 0.172 | 0.2115 |
| P-3-3 | 0.371 | 0.5825 |

**Table S4** Variation of modulus-based and energy-based damage variables with impact cycles

| **Group no.** | **Energy-based damage variable** |
| --- | --- |
| CP-1-1 | 0.12788 |
| CP-1-2 | 0.19808 |
| CP-1-3 | 0.26346 |
| CP-1-4 | 0.44327 |
| CP-1-5 | 0.73846 |
| CP-1-6 | 1 |
| CP-2-1 | 0.21791 |
| CP-2-2 | 0.40795 |
| CP-2-3 | 0.51348 |
| CP-2-4 | 1 |
| CP-3-1 | 0.53268 |
| CP-3-2 | 0.84057 |
| CP-3-3 | 1 |
| P-1-1 | 0.01974 |
| P-1-2 | 0.04317 |
| P-1-3 | 0.06812 |
| P-1-4 | 0.09618 |
| P-1-5 | 0.12534 |
| P-1-6 | 0.15824 |
| P-1-7 | 0.19215 |
| P-1-8 | 0.22715 |
| P-1-9 | 0.27211 |
| P-1-10 | 0.3217 |
| P-1-11 | 0.37197 |
| P-1-12 | 0.44988 |
| P-1-13 | 0.61887 |
| P-1-14 | 1 |
| P-2-1 | 0.05233 |
| P-2-2 | 0.11439 |
| P-2-3 | 0.36452 |
| P-2-4 | 0.65116 |
| P-2-5 | 1 |
| P-3-1 | 0.06781 |
| P-3-2 | 0.36309 |
| P-3-3 | 1 |
